# Supplementary material
Source: PubMed Central journal article supplement (PMC4083468)
Supplement: NIHMS591504-supplement-SI.pdf [file NIHMS591504-supplement-SI.pdf]

## Supporting Information

### Asymmetric Insertion of Membrane Proteins in Lipid Bilayers by Solid-State NMR Paramagnetic Relaxation Enhancement: a Cell-Penetrating Peptide Example

Yongchao Su, Rajeswari Mani <sup>1</sup>, and Mei Hong\*

Department of Chemistry, Iowa State University, Ames, IA 50011

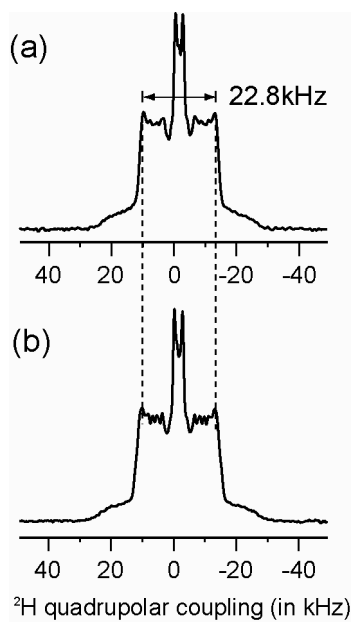

**Figure S1.** Static  $^2\text{H}$  powder spectra of  $d_{54}$ -DMPC/DMPG membrane without (a) and with (b) penetratin at 310 K.
